# Supplementary material for: Microcalcification and Thoracic Aortopathy: A Window Into Disease Severity
Source: PubMed Central journal article supplement (PMC9311465; doi:10.1161/atvbaha.122.317111), 2022-06-30
Supplement: atv-42-1048-s001.pdf [file atv-42-1048-s001.pdf]

## Supplementary Material

### Microcalcification and thoracic aortopathy: a window into disease severity

Alexander J Fletcher,<sup>a</sup> Jennifer Nash,<sup>a</sup> Maaz Syed,<sup>a</sup> Mark G Macaskill,<sup>b</sup> Adriana A S Tavares,<sup>b</sup> Niki Walker,<sup>a,c</sup> Hannah Salcudean,<sup>d</sup> Jonathon A. Leipsic,<sup>d</sup> Kelvin Lim,<sup>e</sup> Jillian Madine,<sup>f,g</sup> William Wallace,<sup>h</sup> Mark Field,<sup>f,i</sup> David E Newby,<sup>a</sup> Rihab Bouchareb,<sup>j</sup> Michael Seidman,<sup>k</sup> Riaz Akhtar,<sup>f</sup> Stephanie Sellers<sup>d</sup>

<sup>a</sup> British Heart Foundation Centre for Cardiovascular Science, University of Edinburgh, Edinburgh, United Kingdom

<sup>b</sup> Edinburgh Imaging Facility, Queens Medical Research Institute, University of Edinburgh, Edinburgh, United Kingdom

<sup>c</sup> Scottish Adult Congenital Cardiology Service, Golden Jubilee National Hospital, Clydebank, Glasgow, United Kingdom

<sup>d</sup> Department of Radiology, Division of Cardiology, and Cardiovascular Translational Lab at the Centre for Heart Lung Innovation, St Paul's Hospital and University of British Columbia, Vancouver, Canada

<sup>e</sup> Department of Cardiothoracic surgery, Royal Infirmary of Edinburgh, United Kingdom

<sup>f</sup> Institute of Systems, Molecular and Integrative Biology, Faculty of Health and Life Sciences, University of Liverpool, Liverpool, United Kingdom

<sup>g</sup> Liverpool Centre for Cardiovascular Sciences, University of Liverpool, Liverpool, United Kingdom

<sup>h</sup> Division of Pathology, University of Edinburgh, Edinburgh, UK

<sup>i</sup> Dept of Cardiothoracic Surgery, Liverpool Heart and Chest Hospital and 'f' (LCCS)

<sup>j</sup> Cardiovascular Research Institute, Department of medicine, The Icahn School of Medicine at Mount Sinai, New York, United States of America

<sup>k</sup> Department of Laboratory Medicine & Pathobiology, Toronto General Hospital, Canada

<sup>J</sup> Department of Mechanical, Materials and Aerospace Engineering, School of Engineering, University of Liverpool, Liverpool, United Kingdom

## Major Resources Table

In order to allow validation and replication of experiments, all essential research materials listed in the Methods should be included in the Major Resources Table below. Authors are encouraged to use public repositories for protocols, data, code, and other materials and provide persistent identifiers and/or links to repositories when available. Authors may add or delete rows as needed.

### Antibodies

| Target antigen       | Vendor or Source | Catalog #  | Working concentration              | Persistent ID / URL                                                                                                                                                                                                                         |
|----------------------|------------------|------------|------------------------------------|---------------------------------------------------------------------------------------------------------------------------------------------------------------------------------------------------------------------------------------------|
| Osteopontin          | Sigma-Aldrich    | O7264      | 5µg/ml<br>(1:200 of 1mg/ml)        | <a href="https://www.sigmaaldrich.com/GB/en/product/sigma/o7264">https://www.sigmaaldrich.com/GB/en/product/sigma/o7264</a>                                                                                                                 |
| Cleaved Caspase III  | Cell Signaling   | 9664       | 0.4µg/ml<br>(1:100 of 40 0.4µg/ml) | <a href="https://www.cellsignal.com/products/primary-antibodies/cleaved-caspase-3-asp175-5a1e-rabbit-mab/9664">https://www.cellsignal.com/products/primary-antibodies/cleaved-caspase-3-asp175-5a1e-rabbit-mab/9664</a>                     |
| Alkaline phosphatase | Abcam            | ab95462    | 1:300*                             | <a href="https://www.abcam.com/Alkaline-Phosphatase-antibody-ab95462.html">https://www.abcam.com/Alkaline-Phosphatase-antibody-ab95462.html</a>                                                                                             |
| ERK                  | Cell Signaling   | 9102       | 0.4µg/ml<br>(1:50 of 19µg/ml)      | <a href="https://www.cellsignal.com/products/primary-antibodies/p44-42-mapk-erk1-2-antibody/9102">https://www.cellsignal.com/products/primary-antibodies/p44-42-mapk-erk1-2-antibody/9102</a>                                               |
| BMP2                 | Bio-Rad          | AHP 960    | 1µg/ml<br>(1:100 of 100µg/ml)      | <a href="https://www.bio-rad-antibodies.com/polyclonal/human-bmp-2-antibody-ahp960.html?f=purified">https://www.bio-rad-antibodies.com/polyclonal/human-bmp-2-antibody-ahp960.html?f=purified</a>                                           |
| Runx2                | LSBio            | LS-C385968 | 10µg/ml                            | <a href="https://www.lsbio.com/antibodies/cbfa1-antibody-runx2-antibody-internal-elisa-ihc-wb-western-ls-c385968/398069">https://www.lsbio.com/antibodies/cbfa1-antibody-runx2-antibody-internal-elisa-ihc-wb-western-ls-c385968/398069</a> |
| WNT3a                | Abcam            | Ab28472    | 5µg/ml<br>(1:200 of 1mg/ml)        | <a href="https://www.abcam.com/Wnt3a-antibody-ab28472.html">https://www.abcam.com/Wnt3a-antibody-ab28472.html</a>                                                                                                                           |

\*whole antiserum, manufacturer does not provide concentration and recommends working dilutions

## Supplementary Results

### **Aortic wall microcalcification is associated with aortic valve disease**

Across 57 patients with thoracic aortopathy, univariable linear regression analysis demonstrated that higher microcalcification content (percentage area) was associated with moderate ( $\beta=17.38$ ,  $p=0.011$ ) and severe ( $\beta=5.91$ ,  $p=0.0496$ ) aortic valve stenosis, whereas mild ( $\beta= -8.37$ ,  $p=0.028$ ), moderate ( $\beta= -9.14$ ,  $p=0.0486$ ) and severe ( $\beta= -7.27$ ,  $p=0.049$ ) aortic regurgitation were associated with lower microcalcification compared to those without valve disease. There were no associations between age, sex, presence of bicuspid aortic valve, smoking, hypercholesterolaemia, family history, hypertension or aortic diameters and microcalcification content (all  $p>0.05$ , Supplementary Table 4).

## Figure S1

Representative staining of alkaline phosphatase (ALP), osteopontin (OPN) and caspase III (Cas3) for each of the four semi-quantitative scoring categories.

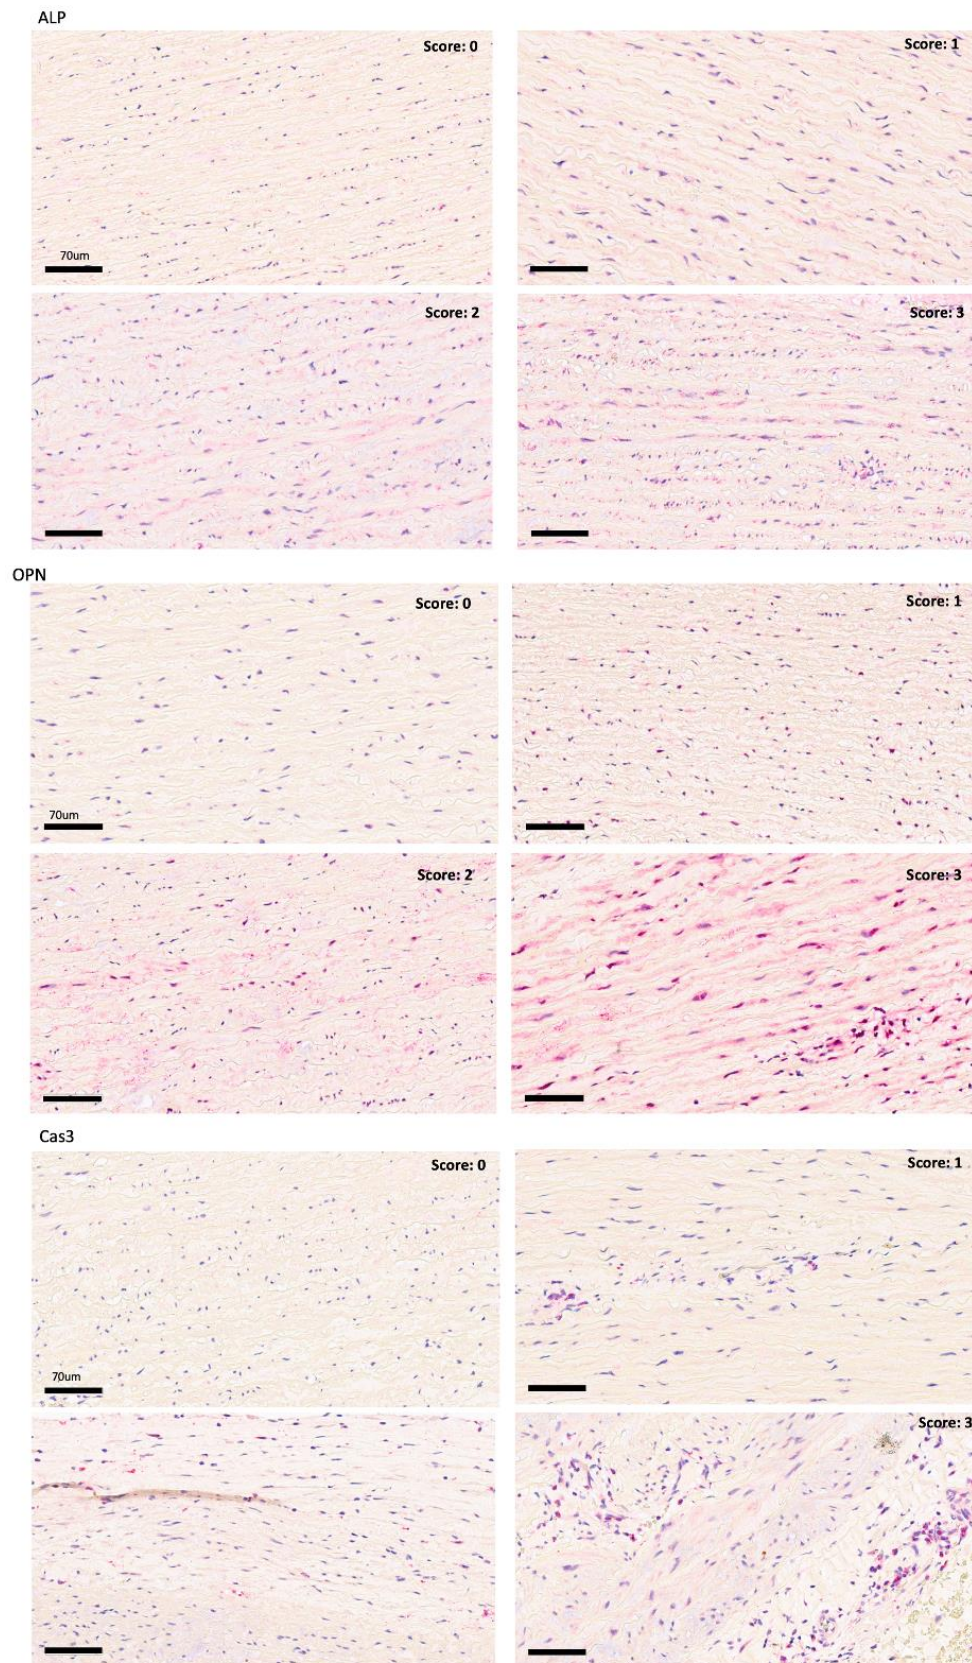

## Figure S2

### Examples of microcalcification quantification on images of samples stained with von Kossa.

Thresholding at 50% of total sample opacity then windowing within 10% to achieve visually optimal coverage of von Kossa staining. Microcalcification severity categories are divided into minimal, mild, moderate and severe.

#### Microcalcification scoring (% area above standardized threshold)

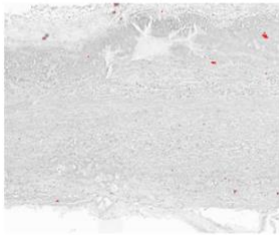

None (<1 %)

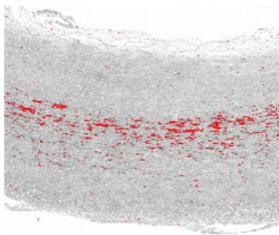

Mild (1-4.9 %)

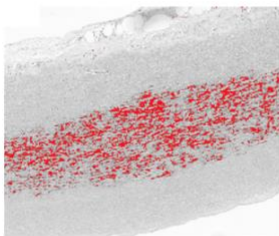

Moderate (5-9.9 %)

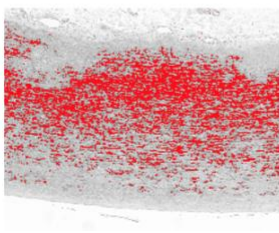

Severe (10+ %)

### Figure S3

Intra-rater repeatability of the percentage area microcalcification quantification. Excellent repeatability, with an interclass correlation co-efficient of 0.97 and co-efficient of repeatability of 4.

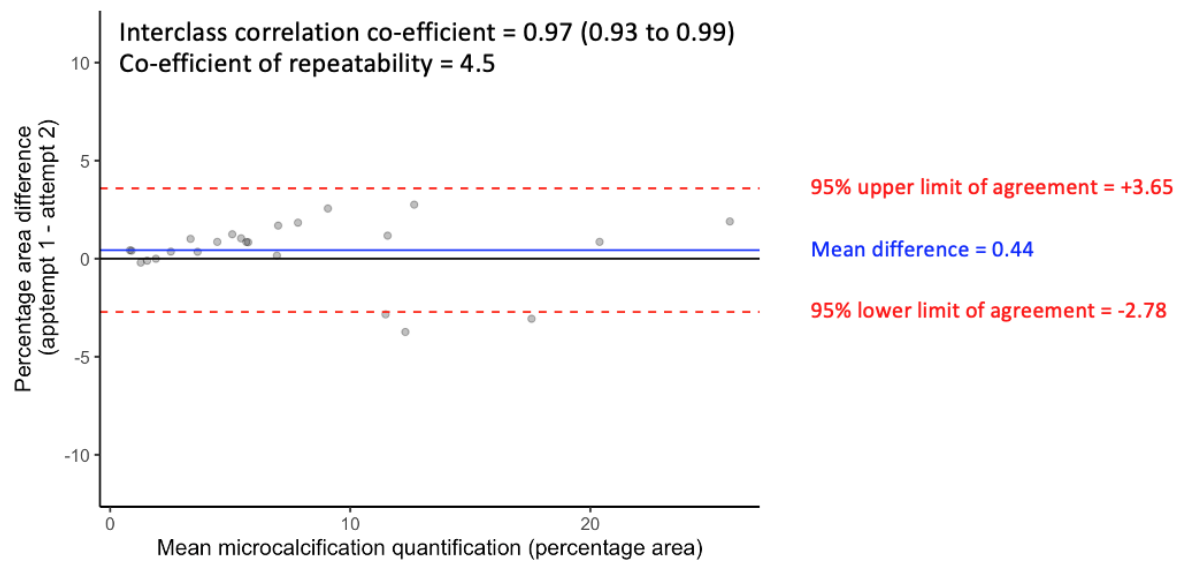

**Figure S4**

Control aortic tissue demonstrating healthy appearing elastin with minimal calcification (white, A) confirmed on X-ray dispersion element analysis with low levels of calcium and phosphate (B). More calcification is seen in a patient with mild histopathological aortopathy and intact elastin (C), confirmed on X-ray dispersion element analysis with high concentrations of calcium and phosphate in a 2:1 ratio signifying hydroxyapatite (D). Weight % =  $100 * \text{weight of one component (element)} / \text{weight of entire sample}$ . Atomic % =  $100 * \text{number of atoms of one component} / \text{total number of all atoms in sample}$ .

Control without aortopathy

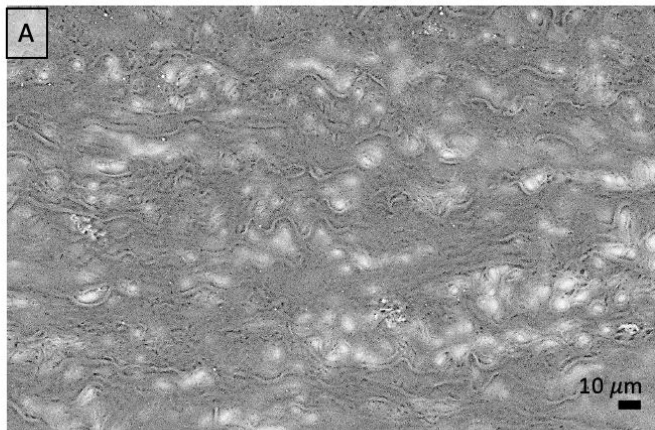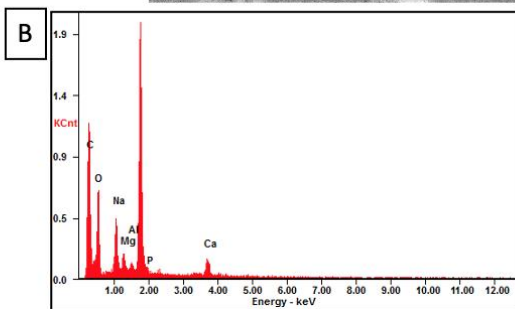

| Element | Wt%        | At%   |
|---------|------------|-------|
| CK      | 50.50      | 63.54 |
| OK      | 24.41      | 23.06 |
| NaK     | 04.23      | 02.78 |
| MgK     | 01.23      | 00.76 |
| AlK     | 00.35      | 00.20 |
| SiK     | 14.09      | 07.58 |
| PK      | 01.03      | 00.50 |
| CaK     | 04.17      | 01.57 |
| Matrix  | Correction | ZAF   |

Mild Histological Aortopathy Severity

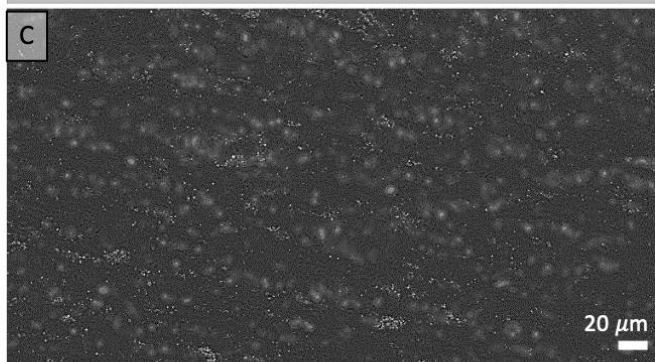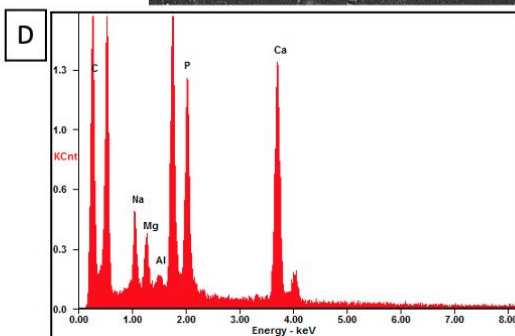

| Element | Wt%        | At%   |
|---------|------------|-------|
| CK      | 41.44      | 56.70 |
| OK      | 25.97      | 26.68 |
| NaK     | 02.24      | 01.60 |
| MgK     | 01.27      | 00.86 |
| AlK     | 00.22      | 00.14 |
| SiK     | 07.46      | 04.36 |
| PK      | 07.33      | 03.89 |
| CaK     | 14.07      | 05.77 |
| Matrix  | Correction | ZAF   |



**Figure S5**

Aortic tissue from a patient with moderate histopathological aortopathy with substantial microcalcification precipitating along grossly intact elastin fibres (orange arrows, A). A magnified area of intense microcalcification deposition demonstrates varying sizes of hydroxyapatite crystal as it starts to coalesce (B), confirmed as hydroxyapatite on energy X-ray dispersion element analysis. In severe histopathological severity (D-F), a similar pattern of microcalcification precipitation along intact elastin fibres is seen (orange arrows), however areas of total elastin loss are devoid of microcalcification (yellow arrows), with X-ray dispersion confirming lower overall hydroxyapatite content (F).

### Moderate Histological Aortopathy Severity

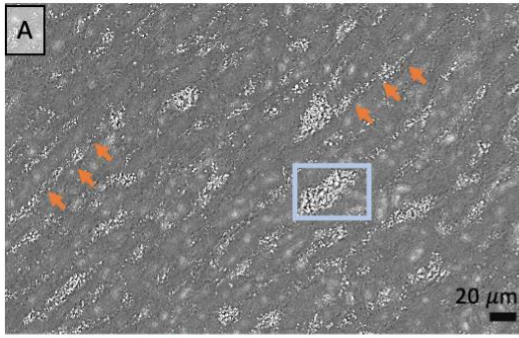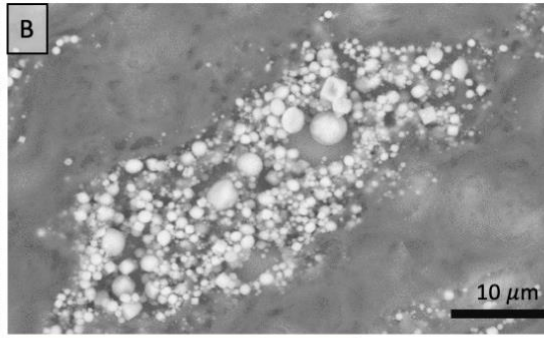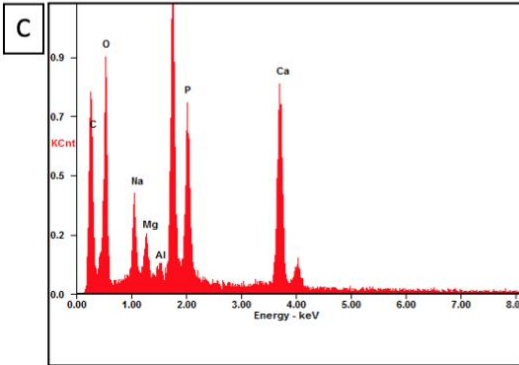

| Element | Wt%        | At%   |
|---------|------------|-------|
| CK      | 50.45      | 65.22 |
| OK      | 21.29      | 20.66 |
| NaK     | 02.65      | 01.79 |
| MgK     | 01.04      | 00.66 |
| AlK     | 00.30      | 00.17 |
| SiK     | 09.50      | 05.25 |
| PK      | 04.56      | 02.28 |
| CaK     | 10.21      | 03.96 |
| Matrix  | Correction | ZAF   |

### Severe Histological Aortopathy Severity

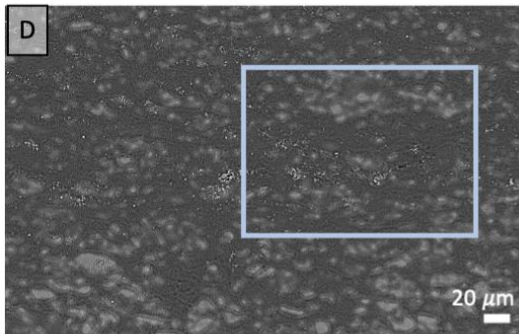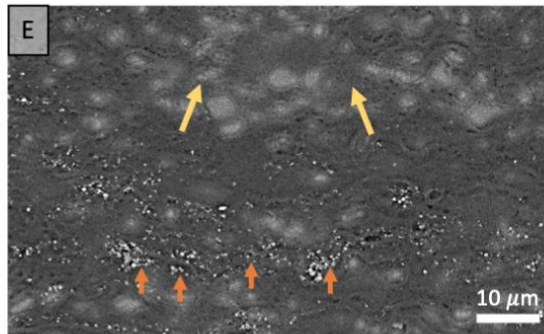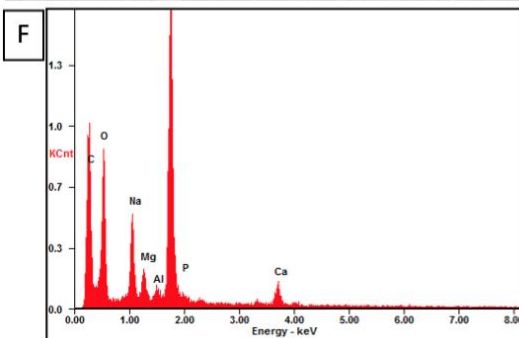

| Element | Wt%        | At%   |
|---------|------------|-------|
| CK      | 51.01      | 64.49 |
| OK      | 22.23      | 21.10 |
| NaK     | 04.39      | 02.90 |
| MgK     | 01.36      | 00.85 |
| AlK     | 00.39      | 00.22 |
| SiK     | 15.67      | 08.47 |
| PK      | 00.90      | 00.44 |
| CaK     | 04.04      | 01.53 |
| Matrix  | Correction | ZAF   |

**Figure S6**

Within sample analysis in samples with discrete areas of both high and low microcalcification (A). Elastin content is higher in discrete areas of high microcalcification. (B-G) Representative example of an aortopathy sample with clear areas of high (C&F) and low (D&G) microcalcification.

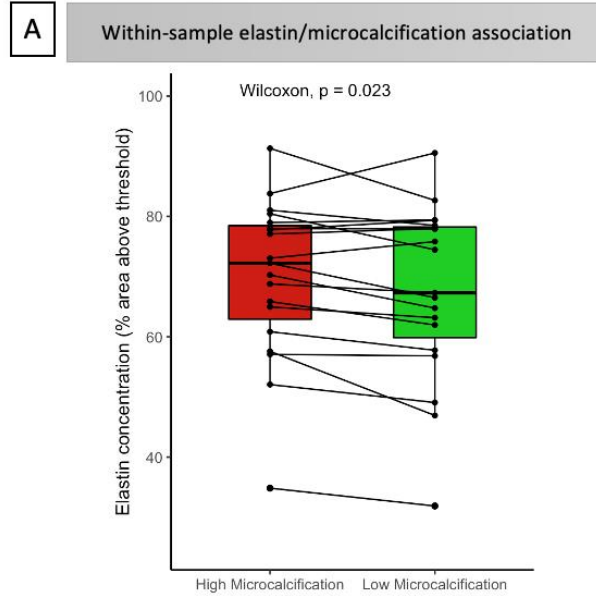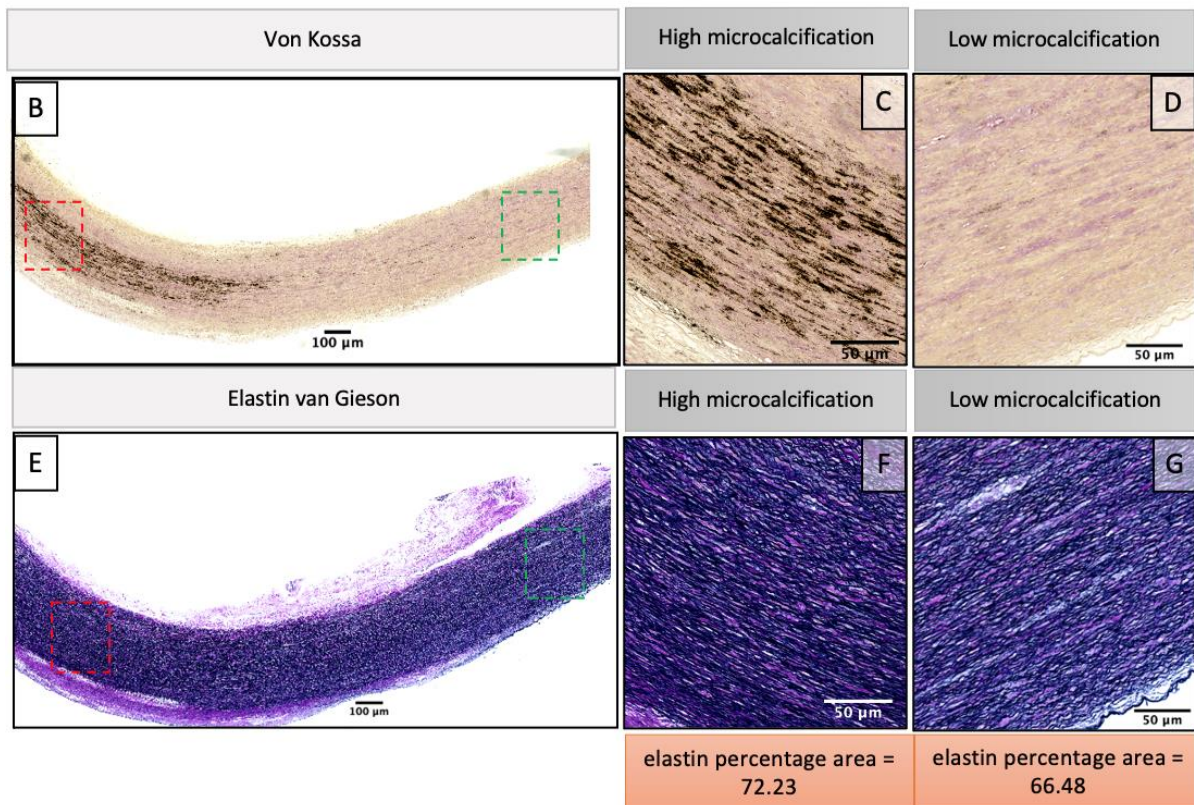

**Figure S7**

(A-D) representative staining of osteopontin (A&B) and microcalcification (von Kossa staining, C&D) demonstrating co-localization between osteopontin positive staining and dense microcalcification precipitation in tricuspid aortic valve thoracic aortopathy sample.

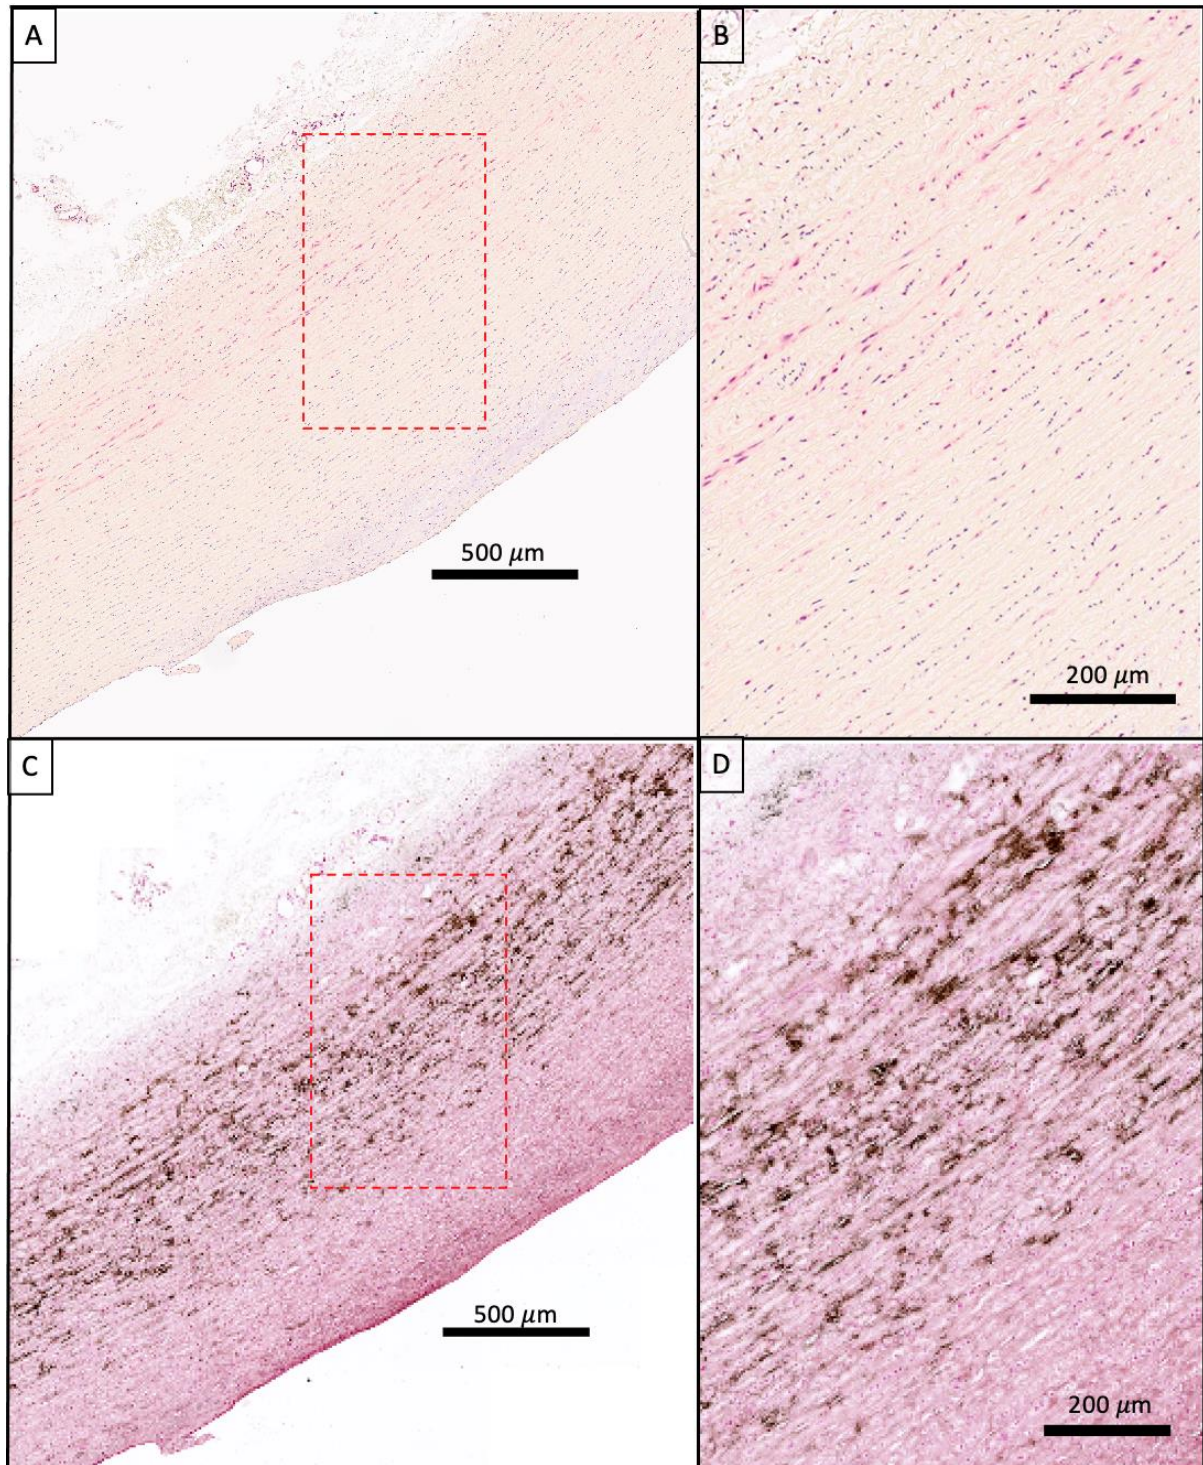

**Table S1. Pathology score stratified by patient cohort**

|                                                                        | <b>Bicuspid<br/>aortic valve<br/>(n=41)</b> | <b>Tricuspid<br/>aortic valve<br/>(n=23)</b> | <b>Thoracic<br/>aortic<br/>dissection<br/>(n=18)</b> | <b>Between<br/>group (X<sup>2</sup>)<br/>p-value</b> |
|------------------------------------------------------------------------|---------------------------------------------|----------------------------------------------|------------------------------------------------------|------------------------------------------------------|
| <b>Overall score</b>                                                   | 5.00<br>[4.00 to 6.00]                      | 6.00<br>[4.00 to 10.50]                      | 8.50<br>[6.25 to 9.00]                               | 0.001                                                |
| <b>Atheroma presence</b>                                               | 16 (39.0)                                   | 9 (39.1)                                     | 7 (50.0)                                             | 0.645                                                |
| <b>Intra-lamellar mucoid<br/>extracellular matrix<br/>accumulation</b> |                                             |                                              |                                                      | <0.001                                               |
| Absent                                                                 | 0                                           | 0                                            | 0                                                    |                                                      |
| Mild                                                                   | 18 (43.9)                                   | 8 (34.8)                                     | 0 (0.0)                                              |                                                      |
| Moderate                                                               | 18 (43.9)                                   | 8 (34.8)                                     | 6 (33.3)                                             |                                                      |
| Severe                                                                 | 5 (12.2)                                    | 7 (30.4)                                     | 12 (66.7)                                            |                                                      |
| <b>Trans-lamellar mucoid<br/>extracellular matrix<br/>accumulation</b> |                                             |                                              |                                                      | 0.064                                                |
| Absent                                                                 | 23 (56.1)                                   | 8 (34.8)                                     | 6 (33.3)                                             |                                                      |
| Moderate                                                               | 15 (36.6)                                   | 9 (39.1)                                     | 8 (44.4)                                             |                                                      |
| Severe                                                                 | 3 (7.3)                                     | 6 (26.1)                                     | 4 (22.2)                                             |                                                      |
| <b>Elastin fragmentation or<br/>loss</b>                               |                                             |                                              |                                                      | <0.001                                               |
| Absent                                                                 | 0 (0.0)                                     | 0 (0.0)                                      | 1 (5.6)                                              |                                                      |
| Mild                                                                   | 31 (75.6)                                   | 10 (45.5)                                    | 3 (16.7)                                             |                                                      |
| Moderate                                                               | 7 (17.1)                                    | 4 (18.2)                                     | 8 (44.4)                                             |                                                      |
| Severe                                                                 | 3 (7.3)                                     | 8 (36.4)                                     | 6 (33.3)                                             |                                                      |
| <b>Smooth muscle cell loss</b>                                         |                                             |                                              |                                                      | 0.189                                                |
| Absent                                                                 | 1 (2.4)                                     | 0 (0.0)                                      | 0 (0.0)                                              |                                                      |
| Mild                                                                   | 38 (92.7)                                   | 21 (95.5)                                    | 16 (88.9)                                            |                                                      |
| Moderate                                                               | 2 (4.9)                                     | 1 (4.5)                                      | 0 (0.0)                                              |                                                      |
| Severe                                                                 | 0 (0.0)                                     | 0 (0.0)                                      | 2 (11.1)                                             |                                                      |
| <b>Medial collapse</b>                                                 |                                             |                                              |                                                      | 0.389                                                |
| Absent                                                                 | 33 (80.5)                                   | 12 (54.5)                                    | 12 (66.7)                                            |                                                      |
| Mild                                                                   | 7 (17.1)                                    | 7 (31.8)                                     | 6 (33.3)                                             |                                                      |
| Moderate                                                               | 1 (2.4)                                     | 2 (9.1)                                      | 0 (0.0)                                              |                                                      |
| Severe                                                                 | 0 (0.0)                                     | 1 (4.5)                                      | 0 (0.0)                                              |                                                      |

Data presented as median [inter-quartile range] or number (percentage)

**Table S2. Categorical repeatability of microcalcification quantification**

|                                        | <b>Microcalcification<br/>category<br/>Assessment 1<br/>(n=24)</b> | <b>Microcalcification<br/>category<br/>Assessment 2<br/>(n=24)</b> |
|----------------------------------------|--------------------------------------------------------------------|--------------------------------------------------------------------|
| <b>Minimal - 0 to 0.99%</b>            | 0 (0.0)                                                            | 2 (8.3)                                                            |
| <b>Mild - 1.00 to 4.99%</b>            | 9 (37.5)                                                           | 9 (37.5)                                                           |
| <b>Moderate - 5.00 to 9.99%</b>        | 7 (29.2)                                                           | 6 (25.0)                                                           |
| <b>Severe - <math>\geq 10\%</math></b> | 8 (33.3)                                                           | 7 (29.2)                                                           |

**Table S3. Semi-quantitative immunohistochemistry scores for each biomarker assessed**

|                           | <b>Aortopathy<br/>(n=42)</b> | <b>Control<br/>(n=7)</b> | <b>p-value (<math>\chi^2</math>)</b> |
|---------------------------|------------------------------|--------------------------|--------------------------------------|
| <b>Caspase III Intima</b> |                              |                          | <b>0.569</b>                         |
| Minimal                   | 32 (76.2)                    | 5 (71.4)                 |                                      |
| Mild                      | 5 (11.9)                     | 2 (28.6)                 |                                      |
| Moderate                  | 2 (4.8)                      | 0 (0.0)                  |                                      |
| Severe                    | 3 (7.1)                      | 0 (0.0)                  |                                      |
| <b>Caspase III Media</b>  |                              |                          | <b>0.266</b>                         |
| Minimal                   | 26 (61.9)                    | 7 (100.0)                |                                      |
| Mild                      | 14 (33.3)                    | 0 (0.0)                  |                                      |
| Moderate                  | 1 (2.4)                      | 0 (0.0)                  |                                      |
| Severe                    | 1 (2.4)                      | 0 (0.0)                  |                                      |
| <b>Osteopontin</b>        |                              |                          | <b>0.001</b>                         |
| Minimal                   | 9 (21.4)                     | 7 (100.0)                |                                      |
| Mild                      | 13 (31.0)                    | 0 (0.0)                  |                                      |
| Moderate                  | 11 (26.2)                    | 0 (0.0)                  |                                      |
| Severe                    | 9 (21.4)                     | 0 (0.0)                  |                                      |
| <b>p-ERK</b>              |                              |                          | <b>0.138</b>                         |
| Minimal                   | 11 (26.2)                    | 4 (66.7)                 |                                      |
| Mild                      | 12 (28.6)                    | 2 (33.3)                 |                                      |
| Moderate                  | 14 (33.3)                    | 0 (0.0)                  |                                      |
| Severe                    | 5 (11.9)                     | 0 (0.0)                  |                                      |

**Table S4. Patient-level associations with thoracic aortic microcalcification content**

|                                  | <b>β-estimate</b> | <b>Standard error</b> | <b>Intercept</b> | <b>p-value</b> |
|----------------------------------|-------------------|-----------------------|------------------|----------------|
| <b>Age</b>                       | 0.09              | 0.073                 | 0.089            | 0.22           |
| <b>Sex</b>                       | 0.32              | 1.87                  | 5.45             | 0.86           |
| <b>Current smoker</b>            | -0.89             | 2.54                  | 6.17             | 0.73           |
| <b>Family history aortopathy</b> | -2.56             | 2.91                  | 5.98             | 0.38           |
| <b>Hypertension</b>              | -0.88             | 1.88                  | 6.22             | 0.64           |
| <b>Hyperlipidaemia</b>           | 3.85              | 1.93                  | 3.88             | 0.053          |
| <b>Bicuspid aortic valve</b>     | 2.835             | 1.96                  | 4.39             | 0.15           |
| <b>Aortic Stenosis</b>           |                   |                       |                  |                |
| Mild                             | 2.06              | 4.53                  | 2.02             | 0.66           |
| Moderate                         | 17.38             | 6.07                  | 2.02             | 0.011          |
| Severe                           | 5.91              | 2.78                  | 2.02             | 0.0496         |
| <b>Aortic Regurgitation</b>      |                   |                       |                  |                |
| Mild                             | -8.37             | 3.79                  | 9.84             | 0.042          |
| Moderate                         | -9.14             | 3.79                  | 9.84             | 0.028          |
| Severe                           | -7.27             | 3.41                  | 9.84             | 0.0486         |
| <b>Aortic root diameter</b>      | -0.03             | 0.22                  | 6.42             | 0.89           |
| <b>Ascending aortic diameter</b> | 0.009             | 0.14                  | 5.74             | 0.95           |
| <b>Maximal aortic diameter</b>   | -0.16             | 0.098                 | 14.48            | 0.098          |
